# Supplementary material for: Non-assembled ORF2 Capsid Protein of Porcine Circovirus 2b Does Not Confer Protective Immunity
Source: Preprints.org preprint supplement (doi:10.20944/preprints202108.0089.v1), 2021-08-03
Supplement: Supplementary file 1 [file supplementary]

**Suppl. File 4**

**Nucleotide and amino acid sequences of Baculovirus-expressed PCV2 ORF2**


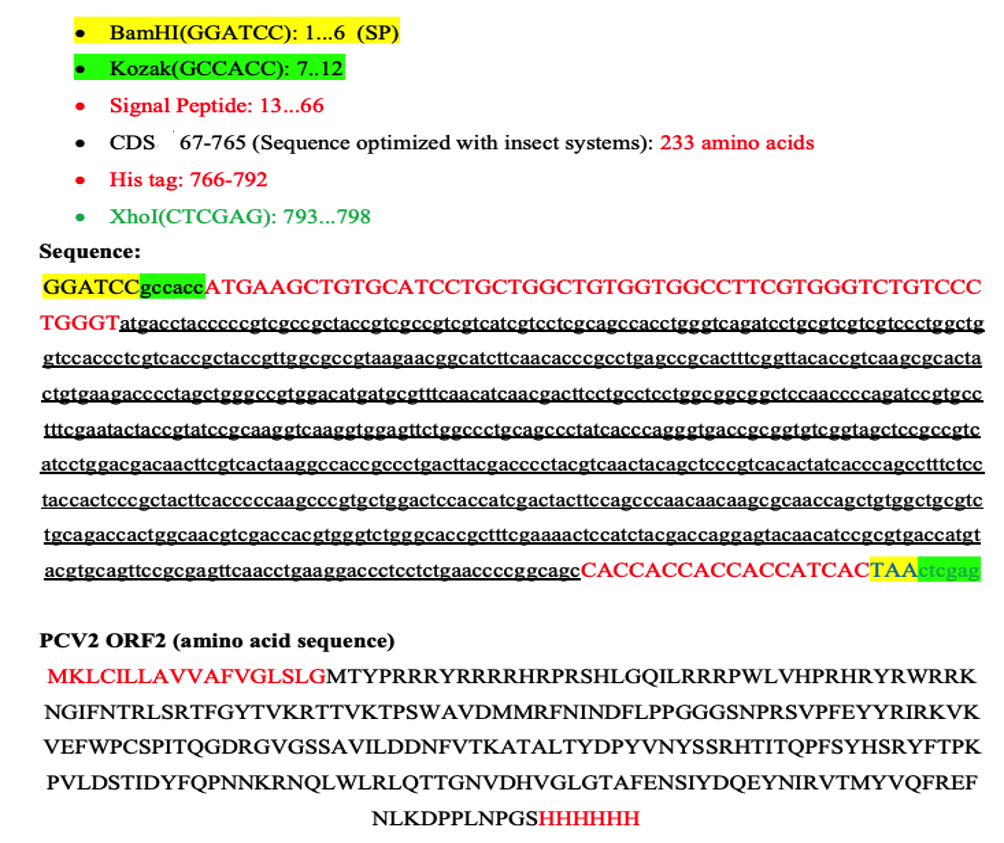


The different parts of recombinant ORF2 gene and proteins are highlighted using colored text. Also, lower and upper case letters are used to ease the recognition of each component. TAA (yellow): stop codon before the XhoI restriction site.
