# Supplementary material for: Non-assembled ORF2 Capsid Protein of Porcine Circovirus 2b Does Not Confer Protective Immunity
Source: Preprints.org preprint supplement (doi:10.20944/preprints202108.0089.v1), 2021-08-03
Supplement: Supplementary file 2 [file Suppl File 1.docx]

**Suppl. File 1**

**Mean weight gains of PCV2 Cap-vaccinated and control pigs**

30-day oldGoland piglets of three different litters (White, Green, Red) were transported to our isolation facilities and weighed two days later. After allocation of piglets to the four experimental groups, there was no significant weight difference between groups A, B, C, D. Each pig was weighed once again immediately after slaughter, i.e. after 71 (groups A and B) and 70 days (groups C and D), at DPI 43 and 42, respectively. The daily mean weight gains did not significantly differ between the different groups (P = 0.457).

Group A: 10.8 mg ORF2 / dose. Group B: 3.6 mg ORF2 / dose.

Group C: 1.2 mg ORF2 / dose. Group D: placebo.
