# Supplementary material for: Non-assembled ORF2 Capsid Protein of Porcine Circovirus 2b Does Not Confer Protective Immunity
Source: Preprints.org preprint supplement (doi:10.20944/preprints202108.0089.v1), 2021-08-03
Supplement: Supplementary file 4 [file Suppl File 3.docx]

**Suppl. File 3**

**Grading of hyperplasia in lymphoid tissues**

**
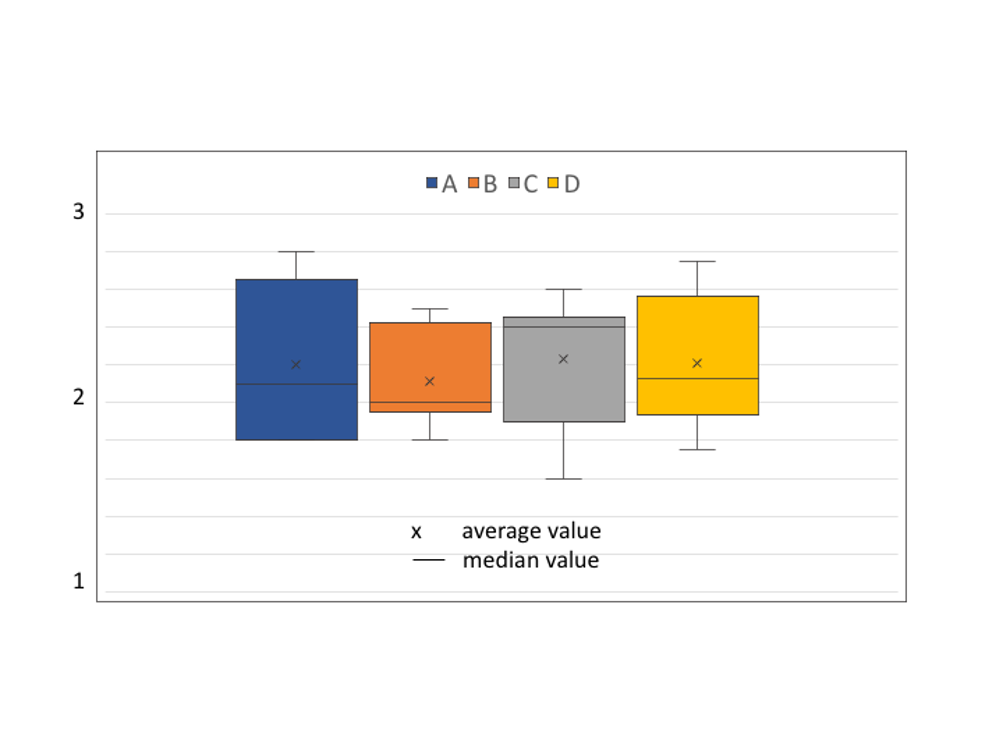
**

In each box, the mean (x) and median (line) values of the hyperplasia grade in all the lymphoid sections (tonsil, spleen, ileum, mesenteric, mediastinic and superficial inguinal lymph nodes) of the relevant group are shown. The whiskers indicate SD. Because data are not normally distributed, median is a better indicator of data distribution, and in each group 1 and 3 are the hyperplasia range values (y axis), estimated as previously described (Guarneri et al., 2021b).

Group A: 10.8 mg ORF2 antigen / dose. Group B: 3.6 mg ORF2 antigen / dose. Group C: 1.2 mg ORF2 antigen / dose. Group D: control.
